# Supplementary material for: Infective Endocarditis – Predictors of In-Hospital Mortality, 17 Years, Single-Center Experience in Bulgaria
Source: Preprints.org preprint supplement (doi:10.20944/preprints202408.2089.v1), 2024-08-28
Supplement: Supplementary file 1 [file supplementary]

Supplement 1. Echocardiographic results.

| Variables | Total IE cases  2005 – 2021  n=270 | IE Non-Survivors  n=67 | IE Survivors  n=203 | p=value |
| --- | --- | --- | --- | --- |
| TTE | 270 (100) | 67 (100) | 203 (100) | N/A |
| ТТЕ + ТOЕ | 97 (35.9) | 11 (16.4) | 86 (42.4) | 0.000* |
| Valve location, n (%) |  |  |  |  |
| АV | 121 (44.8) | 28 (41.8) | 93 (45.8) | 0.568* |
| MV | 74 (27.4) | 17 (25.4) | 58 (28.6) | 0.612* |
| TV | 26 (9.6) | 5 (7.5) | 21 (1p0.3) | 0.500* |
| PV | 1 (0.4) | 1 (1.5) | 0 (0.0) | 0.080* |
| Bivalve IE | 45 (16.7) | 14 (20.8) | 31 (15.3) | 0.287* |
| АV - MV | 37 (13.7) | 10 (14.9) | 27 (13.3) | 0.741* |
| АV - TV | 4 (1.5) | 3 (4.5) | 1 (0.5) | 0.019* |
| MV - TV | 4 (1.5) | 1 (1.5) | 3 (1.5) | 1* |
| CDRIE | 2 (0.74) | 2 (3.0) | 0 (0) | - |
| Vegetations, n (%) | 226 (83.7) | 56 (83.6) | 180 (83.7) | 0.985* |
| < 10 mm | 153 (56.7) | 37 (55.2) | 116 (57.1) | 0.786* |
| 10-15 mm | 38 (14.1) | 9 (13.4) | 29 (14.3) | 0.854* |
| > 15 mm | 35 (13.0) | 10 (14.9) | 25 (12.3) | 0.583* |
| Perivalvular abscess, n (%) | 8 (3.0) | 1 (1.5) | 7 (3.4) | 0.424* |
| Chordal rupture, n (%) | 5 (3.3) | 1 (1.5) | 4 (1.97) | 0.805* |
| EF %. медиана (IQR) | 60 (54-68) | 55 (51-66) | 62 (55-68) | 0.001Ϯ |
| Valve obstruction, n (%) | 32 (11.9) | 10 (14.9) | 22 (10.8) | 0.369* |
| Aortic regurgitation, n (%) | 146 (54) | 39 (58.2) | 107 (52.7) | 0.433* |
| Mild - moderate | 79 (29.3) | 25 (37.3) | 54 (26.6) | 0.095* |
| Severe | 67 (24.8) | 14 (20.9) | 53 (26.1) | 0.393* |
| Mitral regurgitation, n (%) | 115 (42.6) | 33 (49.3) | 82 (40.4) | 0.202* |
| Mild - moderate | 64 (23.7) | 18 (26.9) | 46 (22.6) | 0.473* |
| Severe | 51 (18.9) | 15 (22.4) | 36 (17.8) | 0.405* |
| Tricuspid regurgitation, n (%) | 36 (13.3) | 8 (11,9) | 28 (13.7) | 0.704* |
| Mild - moderate | 16 (6.0) | 1 (1.5) | 15 (7.3) | 0.080* |
| Severe | 20 (7.4) | 7 (10.5) | 13 (6.4) | 0.267* |

*z-test; †Mann-Whitney U Test; ; TTE—transthoracic echocardiography; TOE—transesophageal echocardiography; AV—aortic valve; MV—mitral valve; TV—tricuspid valve; PV- pulmonic valve; CDRIE—cardiac device related IE; EF—ejection fraction.

Supplement 2. Microbiological agent.

|  | Microbiological agent, n (%) | Total IE cases  2005 – 2021  n=270 | IE Non survivors  n-67 | Survivors  n-203 | p-value* |
| --- | --- | --- | --- | --- | --- |
|  | *Negative hemoculture* | 111 (41.1) | 24 (35.8) | 87 (42.8) | 0.271 |
|  | *Staphylococci spp.* | 89 (33.0) | 21 (31.3) | 68 (33.5) | 0.740 |
|  | *Staphylococcus aureus* | 51 (18.9) | 12 (17.9) | 39 (19.2) | 0.814 |
|  | *Staphylococcus CoNS* | 38 (14.1) | 9 (13.4) | 29 (14.3) | 0.854 |
|  | *Streptococci spp.* | 21 (7.8) | 3 (4.5) | 18 (7.0) | 0.468 |
|  | *Streptococcus viridans* | 9 (3.0) | 2 (3.0) | 7 (3.0) | 1.000 |
|  | *Streptococcus beta-hemolyticus* | 2 (0.4) | 0 (0.0) | 2 (0.5) | 0.562 |
|  | *Streptococcus alfa hemolyticus* | 6 (2.2) | 1 (1.5) | 5 (2.5) | 0.632 |
|  | *Streptococci -други* | 4 (1.5) | 0 (0.0) | 4 (2.0) | 0.244 |
|  | *Enterococci spp.* | 25 (9.3) | 8 (11.9) | 17 (8.4) | 0.392 |
|  | *Enterococcus species* | 1 (0.4) | 0 (0.0) | 1 (0.5) | 0.562 |
|  | *Enterococus faecalis* | 23 (8.5) | 8 (11.9) | 15 (7.4) | 0.253 |
|  | *Enterococcus durans* | 1 (0.4) | 0 (0.0) | 1 (0.5) | 0.562 |
|  | *Gram negative (non-HACEK) spp.* | 19 (7.0) | 10 (14.9) | 9 (4.5) | 0.004 |
|  | *Pseudomonas aeruginosa* | 2 (0.7) | 1 (1.5) | 1 (0.5) | 0.410 |
|  | *Escherichia coli* | 9 (3.4) | 5 (7.4) | 4 (2.0) | 0.030 |
|  | *Enterobacter cloacae* | 1 (0.4) | 0 (0.0) | 1 (0.5) | 0.562 |
|  | *Klebsiella pneumoniae* | 3 (1.1) | 1 (1.5) | 2 (1.0) | 0.736 |
|  | *Serratia marcescens* | 4 (1.5) | 3 (4.5) | 1 (0.5) | 0.019 |
|  | *Others* | 5 (1.9) | 2 (3.0) | 3 (1.5) | 0.432 |
|  | *Candida spp* | 3 (1.1) | 1 (1.5) | 2 (1.0) | 0.736 |
|  | *Erysipelothix rhusiopathiae* | 1 (0.4) | 0 (0.0) | 1 (0.5) | 0.562 |
|  | *Brevibacterium casei* | 1 (0.4) | 1 (1.5) | 0 (0.0) | 0.080 |

z – test*; CoNS—coagulase-negative staphylococcus; non-HACEK- (Hemophilus species, Actinobacillus, Cardiobacterium, Eikenella, or Kingella).
